# Supplementary material for: The cost-effectiveness of nivolumab monotherapy for the treatment of advanced melanoma patients in England
Source: Springer Nature journal article supplement (doi:10.1007/s10198-018-0964-4), 2018-03-09
Supplement: MOESM1 [file 15522910]

# Supplementary materials

Methods for the comparison with BRAF inhibitors in the BRAF mutation-positive patient subgroup

Patient-level data were not available for the BRAF inhibitors (dabrafenib and vemurafenib for BRAF+ve patients); therefore, the covariate-adjusted parametric curves for TTP, PrePS and PPS used for nivolumab, ipilimumab and dacarbazine cannot be applied to BRAF inhibitors.

It was also considered that a standard mixed treatment comparison between BRAF inhibitors and immunotherapies (nivolumab and ipilimumab) using published aggregate data may not be robust, with the main reasons being non-proportional hazards between BRAF inhibitors and immunotherapies due to their differing mechanisms of action, high levels of crossover and subsequent ipilimumab use in the BRAF inhibitor trials (10, 11, 38).

In this analysis, for BRAF+ve patients, proportions of patients in the progression free, progressed and dead states with dabrafenib and vemurafenib were therefore modelled using the AUC method based upon published vemurafenib OS and PFS KM curves from the BRIM-3 trial (38). BRIM-3 trial based vemurafenib was chosen because it has much larger sample size (n=675) compared with the dabrafenib BREAK-3 trial (n=250) (11). The published KM data were digitised and pseudo-patient-level data were then used to fit parametric curves. Log-normal and generalised gamma parametric curves were chosen for OS and PFS, respectively, based on statistical fit and clinical plausibility.

The same survival efficacies (OS and PFS) are assumed for dabrafenib and vemurafenib based on the NICE appraisal for dabrafenib (39). For comparability, BRAF+ve patient characteristics based on the vemurafenib BRIM-3 trial were applied to the covariate-adjusted TTP, PPS and PrePS models for nivolumab and ipilimumab for the BRAF+ve patient subgroup. This ensures that the TTP, PrePS and PPS estimated in the model for BRAF+ve patients treated with nivolumab and ipilimumab reflect the same patients (in terms of the prognostic factors included in the covariate-adjusted models) in the BRIM-3 trial, so that model estimated efficacies (in terms of proportions of progression free, progressed and dead) between nivolumab, ipilimumab and BRAF inhibitors are based on the same patient characteristics and are therefore comparable.

Method for covariate-adjusted KM data

TTP pre-100 days was estimated within the economic model based on the observed KM data up to 100 days. To estimate relative efficacy and to control for differences of patient prognostic factors between trials and treatment arms, the KM data for TTP pre-100 days were adjusted by applying HRs estimated from a Cox proportional hazards model for the same covariates used for fitting survival curves (Table S2). This method assumes proportionality of the effects of the prognostic factors and uses these for adjusting the observed TTP pre-100 days KM data to control for differences of these factors between trials and arms. Proportionality of treatment effects (which clearly does not hold for TTP pre-100 days based on the KM data) is not assumed given that the observed by-treatment KM data (rather than fitted parametric curves) are used in the economic model.

Similarly, for the adjustment of KM data for TTP pre-100 days, the KM data for PrePS were adjusted by applying HRs estimated from a Cox proportional hazards model for the same covariates used for fitting survival curves (Table S3).

Table S1: Prognostic characteristics of CheckMate 066 and MDX010-20

|  | **CheckMate 066** | | **MDX010-20** | |
| --- | --- | --- | --- | --- |
| Characteristic | DTIC (n=208) | Nivolumab (n=210) | gp100 (n=136) | Ipilimumab & ipilimumab+gp100 (n=540) |
| ECOG = 0 | 58.2% | 70.5%  (unknown=  0.5%) | 52.9%  (unknown=  0.7%) | 58.3% |
| LDH (>ULN) | 35.6% (4.3% not reported) | 37.6% (5.2% not reported) | 39.7% | 37.2% |
| M stage = M1c | 61.1% | 61.0% | 72.1% | 71.3% |
| History of Brain Metastases | 3.8% | 3.3% | 15.4% | 11.3% |
| Age (under 65) | 45.2% | 50.5% | 69.1% | 71.5% |
| Gender (males) | 60.1% | 57.6% | 53.7% | 60.7% |
| Subsequent ipilimumab | 38.0% | 21.4% | NA (0%) | NA (0%) |
| DTIC, dacarbazine; ECOG, Eastern Cooperative Oncology Group score; gp100, gp100 melanoma peptide vaccine; LDH, lactate dehydrogenase; NA, not applicable, ULN, upper limit of normal range. | | | | | |

Table S2: Cox proportional hazards model; TTP pre-100 days

| **Model parameter** | **Parameter**  **estimate** | **Standard**  **error** | **P-value** | **Hazard**  **ratio** |
| --- | --- | --- | --- | --- |
| Study (CheckMate 066 vs MDX010-20) | -0.10053 | 0.14838 | 0.4981 | 0.904 |
| Treatment (ipilimumab vs palliative chemotherapy) | -0.27502 | 0.12212 | 0.0243 | 0.760 |
| Treatment (nivolumab vs palliative chemotherapy) | -0.69219 | 0.15662 | <0.0001 | 0.500 |
| Sex (male vs female) | 0.10456 | 0.08729 | 0.2310 | 1.110 |
| Age group  (under 65 vs 65 and over) | 0.07851 | 0.09196 | 0.3933 | 1.082 |
| ECOG  (ECOG=0 vs ECOG ≥1) | 0.03920 | 0.09223 | 0.6708 | 1.040 |
| Elevated LDH (>ULN vs ≤ULN) | 0.34677 | 0.09647 | 0.0003 | 1.414 |
| M stage (M1c vs M0 or M1a or M1b) | -0.00651 | 0.09874 | 0.9474 | 0.994 |
| History of brain metastases (yes vs no) | -0.06095 | 0.15250 | 0.6894 | 0.941 |
| ECOG, Eastern Cooperative Oncology Group score; LDH, lactate dehydrogenase; ULN, upper limit of normal range; TTP, time to progression. | | | | |

Table S3: Cox proportional hazards model; PrePS

| **Model parameter** | **Parameter**  **estimate** | **Standard**  **error** | **P-value** | **Hazard**  **ratio** |
| --- | --- | --- | --- | --- |
| Study (CheckMate 066 vs MDX010-20) | -0.77439 | 0.32147 | 0.0160 | 0.461 |
| Treatment (ipilimumab vs palliative chemotherapy) | -0.17910 | 0.22646 | 0.4290 | 0.836 |
| Treatment (nivolumab vs palliative chemotherapy) | -1.06624 | 0.41501 | 0.0102 | 0.344 |
| Sex (male vs female) | 0.31757 | 0.16339 | 0.0519 | 1.374 |
| Age group  (under 65 vs 65 and over) | -0.06347 | 0.16934 | 0.7078 | 0.939 |
| ECOG  (ECOG=0 vs ECOG ≥1) | -0.97366 | 0.17286 | <0.0001 | 0.378 |
| Elevated LDH (>ULN vs ≤ULN) | 1.24471 | 0.18430 | <0.0001 | 3.472 |
| M stage (M1c vs M0 or M1a or M1b) | 0.58809 | 0.24684 | 0.0172 | 1.801 |
| History of brain metastases (yes vs no) | 0.01643 | 0.24329 | 0.9462 | 1.017 |
| ECOG, Eastern Cooperative Oncology Group score; LDH, lactate dehydrogenase; PrePS, pre-progression survival; ULN, upper limit of normal range. | | | | |

Table S4: Log-logistic model parameter estimates for PPS

| **Model parameter** | **Estimate** | **Standard error** | **p-value** |
| --- | --- | --- | --- |
| Scalea | 0.683  (0.381a) | 0.026 |  |
| Intercept | 5.152 | 0.178 | <0.0001 |
| Treatment: ipilimumab vs palliative chemotherapy | 0.403 | 0.135 | 0.003 |
| Treatment: nivolumab vs palliative chemotherapy | 0.381 | 0.197 | 0.054 |
| Study: CheckMate 066 vs MDX010-20 | 0.137 | 0.188 | 0.468 |
| Sex: male vs female | -0.132 | 0.098 | 0.178 |
| Aged under 65: Yes vs No | 0.168 | 0.105 | 0.111 |
| High LDH: Yes vs No | -0.897 | 0.111 | <0.001 |
| ECOG: 0 vs ≥1 | 0.349 | 0.103 | 0.001 |
| M stage: M1c vs ‘M0 or M1a or M1b’ | -0.099 | 0.112 | 0.375 |
| History of brain metastases: Yes vs No | -0.075 | 0.164 | 0.650 |
| Subsequent ipilimumab: Yes vs No | 0.667 | 0.189 | <0.001 |
| ECOG, Eastern Cooperative Oncology Group score; LDH, lactate dehydrogenase; PPS, post-progression survival; ULN, upper limit of normal range.  a Care should be taken as different statistical packages have different model parameterisations and use different terminology for parameters; this model was fit using the package ‘flexusurv’ in R. | | | | |

Table S5: Gompertz model parameter estimates for post-100 day TTP

| **Model Parameter** | **Estimate** | **Lower 95% CL** | **Upper 95% CL** |
| --- | --- | --- | --- |
| Shape | -0.004 | -0.005 | -0.003 |
| Rate (intercept) | 0.006 | 0.003 | 0.013 |
| Treatment: ipilimumab vs palliative chemotherapy | -0.395 | -0.986 | 0.197 |
| Treatment: nivolumab vs palliative chemotherapy | -1.430 | -1.920 | -0.933 |
| Study: CheckMate 066 vs MDX010-20 | 0.342 | -0.297 | 0.980 |
| Sex: male vs female | -0.152 | -0.475 | 0.172 |
| Aged under 65: Yes vs No | 0.180 | -0.160 | 0.521 |
| High LDH: Yes vs No | -0.195 | -0.604 | 0.215 |
| ECOG: 0 vs ≥1 | -0.057 | -0.406 | 0.292 |
| M stage: M1c vs ‘M0 or M1a or M1b’ | 0.290 | -0.055 | 0.635 |
| History of brain metastases: Yes vs No | 0.111 | -0.469 | 0.692 |
| CL, confidence limit; ECOG, Eastern Cooperative Oncology Group score; LDH, lactate dehydrogenase; TTP, time to progression; ULN, upper limit of normal range.  This model was fit using the package ‘flexusurv’ in R. | | | |

Table S6: Statistical model results using EQ-5D data from CheckMate 066

|  | Coefficient | 95% confidence interval | p-value |
| --- | --- | --- | --- |
| Intercept | 0.3676 | (0.2999, 0.4354) | <.0001 |
| Post-progression | -0.0741 | (-0.099, -0.0491) | <.0001 |
| <30 days to death | -0.0223 | (-0.0483, 0.0037) | 0.0923 |
| Baseline EQ-5D | 0.6030 | (0.5242, 0.6817) | <.0001 |
| Treatment: DTIC | -0.0689 | (-0.1090, -0.0289) | 0.0008 |
| Sample size = 288; Baseline EQ-5D = 0.72; Significance level required for covariate inclusion into the model is 0.10. | | | |

Table S7: Summary of key base case model inputs

| **Model inputs** | **Mean (SE)** | **Distribution (for PSA)** | **Sources** |
| --- | --- | --- | --- |
| Discount rate – costs/QALYs | 3.5% | Fixed | NICE guidance (40) |
| ***Patient characteristics*** | | | |
| BRAF mutation-negative | See Table 1 | Fixed | CheckMate 066 trial (21) |
| BRAF mutation-positive | Fixed | BRIM-3 trial (10) |
| ***Survival curves based on indirect comparison for nivolumab, ipilimumab and dacarbazine*** | | | |
| Time to progression | Covariate adjusted KM data (see Table S2) plus parametric curve (Gompertz; see Table S5) | Multivariate-normal distribution using variance-covariance matrices | Patient-level data from CheckMate 066 trial (21) and MDX010-20 trial (22) |
| Post-progression survival | Covariate adjusted parametric curve (log-logistic, see Table 43) |
| Pre-progression survival | Covariate adjusted KM data (see Table S3) | Fixed |
| ***Survival curves for BRAF inhibitors*** | | | |
| OS – vemurafenib | Parametric curve (log-normal) | Multivariate-normal distribution using variance-covariance matrices | Digitised data based on BRIM-3 trial extended follow-up (38) |
| PFS – vemurafenib | Parametric curve (generalised gamma) |
| OS/PFS HR dabrafenib vs vemurafenib | 1 | Fixed | Assumption based on NICE guidance (39) |
| ***Survival curves for long-term survival*** | | | |
| OS from year 3 for nivolumab and ipilimumab | Parametric curve (Gompertz) | Multivariate-normal distribution using variance-covariance matrices | Digitised data based on pooled ipilimumab data (9) |
| OS from year 2 for dacarbazine and BRAF inhibitors | Parametric curve (log-normal) | Digitised data based on AJCC melanoma registry (28) |
| ***Survival curve for time on treatment*** | | | |
| Time on treatment for nivolumab | Covariate adjusted parametric curve (log-logistic) | Multivariate-normal distribution using variance-covariance matrices | Patient-level data from CheckMate 066 trial (21) |
| ***Utilities*** | | | |
| Pre-progression + days left ≥30 days | 0.80 | Multivariate-normal distribution using variance-covariance matrices | Patient-level EQ-5D data from CheckMate 066 trial (21) |
| Pre-progression + days left <30 days | 0.78 |
| Post-progression + days left ≥30 days | 0.73 |
| Post-progression + days left <30 days | 0.71 |
| ***Drug dosing and costs*** | | | |
| Patient height (cm) | 170 (0.48) | Normal | Patient-level data from CheckMate 066 trial (21) |
| Patient weight (kg) | 78.7 (0.61) | Normal |
| Patient body surface area (m2) | 1.90 | Function of height and weight | |
| Dose per administration for nivolumab | 6.40 vials (4ml vial with 10mg/ml concentration) | Fixed | Based on a lognormal distribution fitted using UK individual patient weight in melanoma trials |
| Drug cost of nivolumab per administration (list price) | £2,809.47 | Fixed | List price of £439 for a 4ml nivolumab vial (MIMS August 2016) |
| Dose per administration for nivolumab | 5.22 vials (5ml vial with 10mg/ml concentration) | Fixed | Based on a lognormal distribution fitted using UK individual patient weight in melanoma trials |
| Drug cost of ipilimumab per administration | Confidential known PAS applied | Fixed | List price of £3,750 for a 5ml ipilimumab vial (MIMS August 2016); |
| Drug cost of dacarbazine per administration | £48.21 | Function of body surface | Price of £48.21 for a pack of 10 x 200mg vials assuming nearest full vial pack (eMit December 2014) |
| Drug cost of dabrafenib per day | Assumed PAS applied | Fixed | List price of £1,400 for a pack of 28 x 75mg tablets (MIMS April 2015) and assumed PAS |
| Drug cost of vemurafenib per day | Assumed PAS applied | Fixed | List price of £1,750 for a pack of 56 x 240mg tablets (MIMS April 2015) and assumed PAS |
| Administration cost for nivolumab and ipilimumab | £298.65 (59.73) | Normal | NHS Reference costs 2013/2014 SB13Z |
| Administration cost for dacarbazine | £320.35 (64.07) | Normal | NHS Reference costs 2013/2014 SB15Z |
| Administration cost for BRAF inhibitors (one off) | £156.68 (31.34) | Normal | NHS Reference costs 2013/2014 SB11Z |
| ***Resource use and costs*** | | | |
| Treatment initiation – one off | £663.18 (132.64) | Normal | NICE TA319 (25) and expert opinion |
| Year 1 (per week) | £89.74 (17.95) | Normal |
| Year 2 (per week) | £44.87 (8.97) | Normal |
| Year 3 and beyond (per week) | £26.92 (5.38) | Normal |
| Palliative care period (per week) | £214.27 (42.85) | Normal |
| End of life care – one off | £1,450.91 (290.18) | Normal |
| Length of palliative care period (weeks) | 12 | Fixed | Expert opinion |
| ***Adverse events unit costs*** | | | |
| Hospital stay for endocrine disorders (day) | £246.24 | Fixed | NHS ref cost 2013/14; Other endocrine disorders with CC Score 4+ (KA08A) |
| Hospital stay for other AEs (day) | £275.05 | Fixed | NHS ref cost 2013/14; Non elective inpatients – excess bed days (NEL_XS, average across all areas) |
| Unit cost for outpatient visit (endocrine disorder) | £409.50 | Fixed | Oxford Outcomes (30) |
| Unit cost for outpatient visit (diarrhoea) for immunotherapy | £570.87 | Fixed |
| Unit cost for outpatient visit (diarrhoea) for chemotherapy | £141.58 | Fixed |
| Unit cost for outpatient visit (other AEs) for immunotherapy | £345.66 | Fixed |
| eMit, Drugs and pharmaceutical electronic market information; HR, hazard ratio; KM, Kaplan–Meier; MIMS, Monthly Index of Medical Specialities; NICE, National Institute for Health and Care Excellence; OS, overall survival; PAS, patient access scheme; PFS, progression-free survival; PSA, probabilistic sensitivity analysis; SE, standard error; TA, technology assessment. | | | |

Table S8: Model results - disaggregate costs for dacarbazine arm in BRAF mutation-negative patient population

| **Health state** | **Costs - DTIC** |
| --- | --- |
| Drug costs | £395 |
| Drug admin costs | £2,622 |
| Subsequent ipi costs | £12,714 |
| Treatment initiation | £663 |
| Pre-palliative care | £4,978 |
| Palliative care | £2,340 |
| End of life care | £1,363 |
| AE costs | £153 |
| **Total costs** | £25,228 |
| AE, adverse event; DTIC, dacarbazine. | |

Table S9: Summary of model results compared with clinical data

| Outcome | Clinical trial result | Model result |
| --- | --- | --- |
| ***BRAF mutation-negative short-term results (trial results based on CheckMate 066)*** | | |
| OS at Month 6 for nivolumab – BRAF mutation-negative | 84.1% | 84.8% |
| OS at Month 6 for DTIC – BRAF mutation-negative | 71.8% | 69.0% |
| OS at Year 1 for nivolumab – BRAF mutation-negative | 72.9% | 70.0% |
| OS at Year 1 for DTIC – BRAF mutation-negative | 42.1% | 42.3% |
| PFS at Month 6 for nivolumab – BRAF mutation-negative | 48.0% | 50.0% |
| PFS at Month 6 for DTIC – BRAF mutation-negative | 18.5% | 18.3% |
| PFS at Year 1 for nivolumab – BRAF mutation-negative | 41.8% | 40.5% |
| PFS at Year 1 for DTIC – BRAF mutation-negative | n/a | 6.9% |
| ***BRAF mutation-positive short-term results (trial results based on BRIM-3)*** | | |
| OS at Month 18 for vemurafenib – BRAF mutation-positive | 39% | 40.5% |
| PFS at Month 18 for vemurafenib – BRAF mutation-positive | 14% | 16.2% |
| ***Long-term results (clinical results based on pooled ipilimumab analysis)*** | | |
| OS at Year 3 for ipilimumab | 22% | 22.4% and 18.0%a |
| OS at Year 10 for ipilimumab | 18% | 16.8% and 13.9% a |
| ***Long-term results (clinical results based on CheckMate 003)*** | | |
| OS at Year 2 for nivolumab | 48% and 47%b | 50.6% and 45.0%a |
| OS at Year 3 for nivolumab | 42% and 41%b | 39.8% and 34.5%a |
| OS at Year 4 for nivolumab | 35% and 35%b | 34.9% and 30.3%a |
| OS at Year 5 for nivolumab | 34% and 35%b | 32.8% and 28.4%a |
| OS, overall survival; PFS, progression-free survival.  a, Model results for BRAF mutation-negative and BRAF mutation-positive patients, respectively; b, Trial results based on all doses and 3mg/kg dose, respectively, and from the latest data cut for CheckMate 003 in October 2015. | | |

Figure S1: PPS used in the economic model for BRAF mutation-negative patients

Figure S2: TTP used in the economic model for BRAF mutation-negative patients

Figure S3: PrePS used in the economic model for BRAF mutation-negative patients

Figure S4: Overall survival in the base case model for BRAF mutation-positive analysis


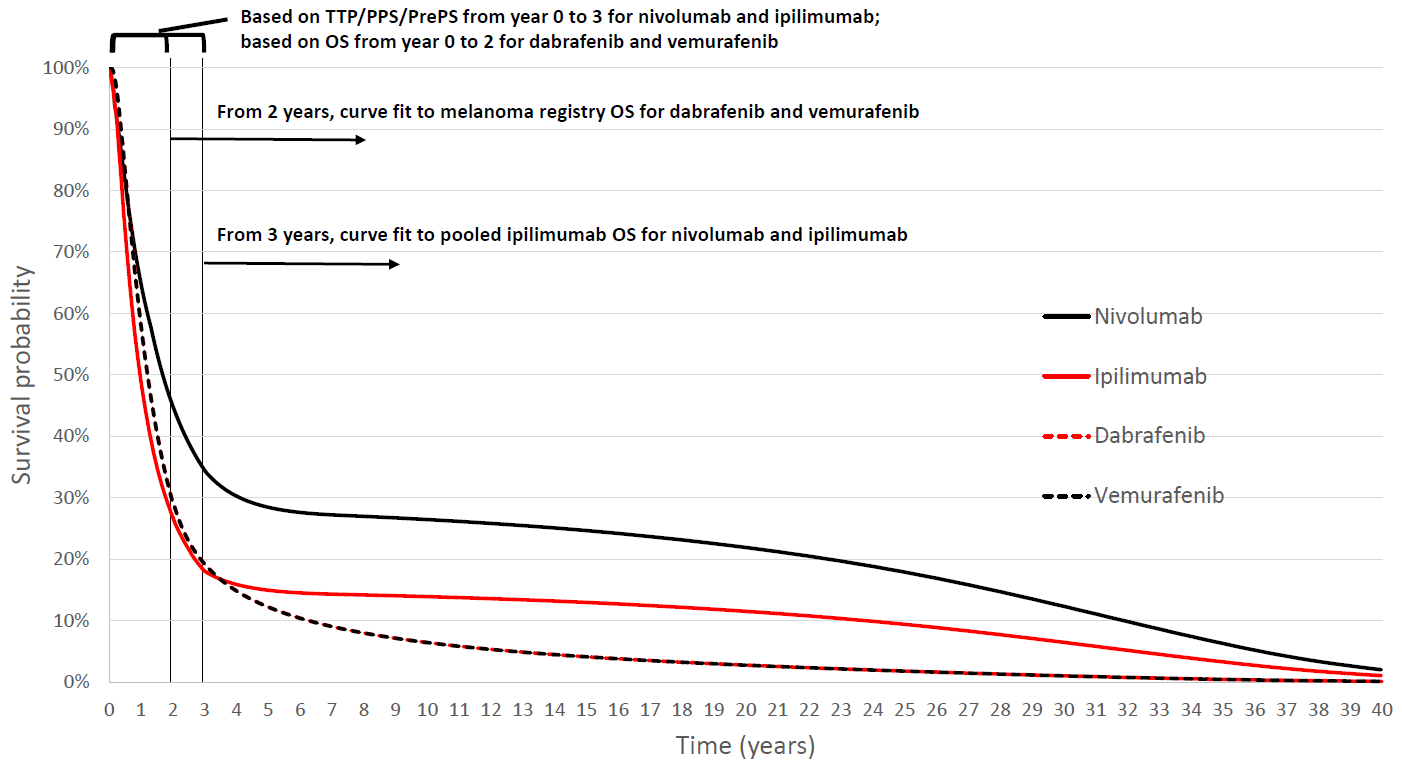


Figure S5: Cost-effectiveness acceptability curve for BRAF mutation positive patients


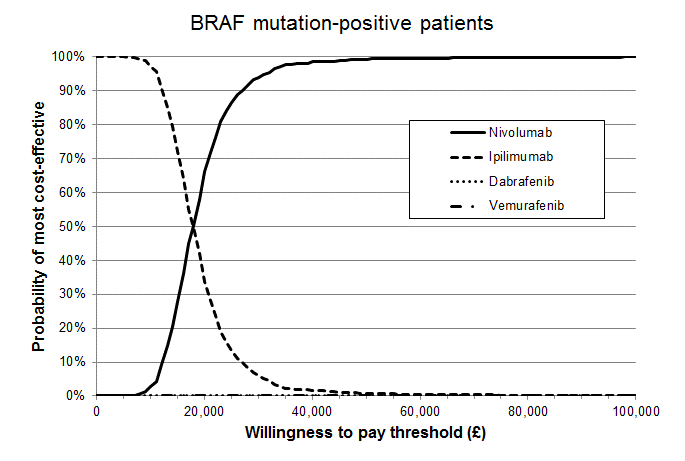


Figure S6: Tornado diagram containing 20 most influential parameters – BRAF mutation-negative

Figure legends:

Figure S1 – DTIC, dacarbazine; PPS, post-progression survival.

Figure S2 – DTIC, dacarbazine; TTP, time to progression.

Figure S3 – DTIC, dacarbazine; PrePS, pre-progression survival.

Figure S4 – OS, overall survival; PPS, post-progression survival; PrePS, pre-progression survival; TTP, time to progression.

Figure S6 - OS, overall survival; PPS, post progression survival; ToT, Time on treatment; TTP, time to progression.
